# Supplementary material for: Google Goes Cancer: Improving Outcome Prediction for Cancer Patients by Network-Based Ranking of Marker Genes
Source: PubMed Central journal article supplement (PMC3355064; doi:10.1371/journal.pcbi.1002511), 2012-05-17
Supplement: pcbi.1002511.s002.pdf [file pcbi.1002511.s002.pdf]

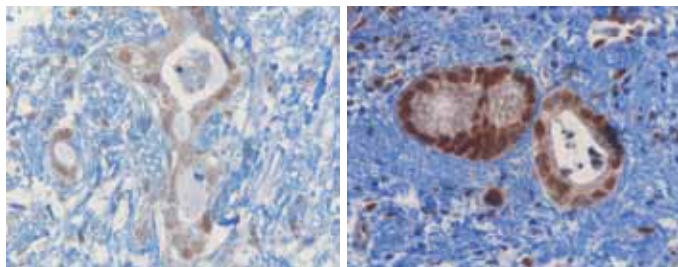

+ FOS +++

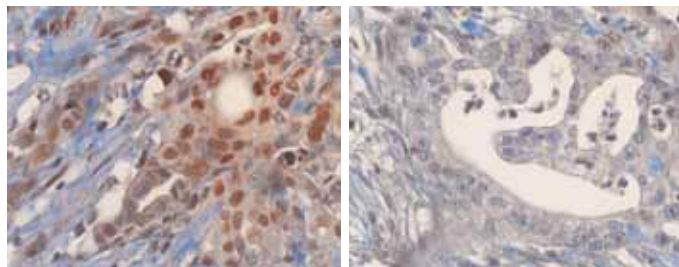

+++ JUN -

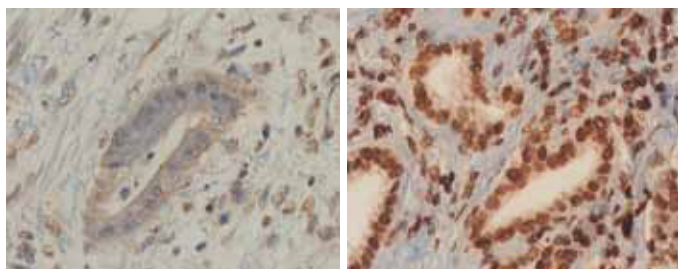

- BRCA1 +++

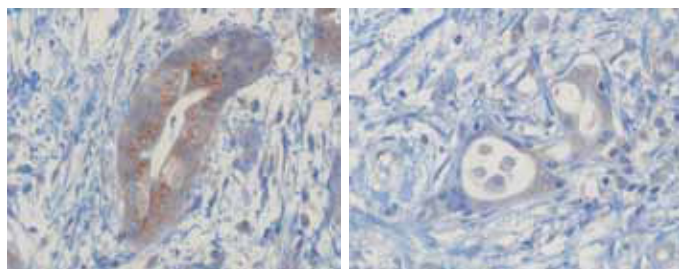

++ CEBPA -

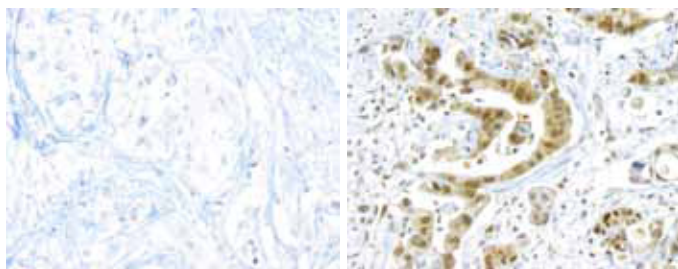

- STAT3 +++

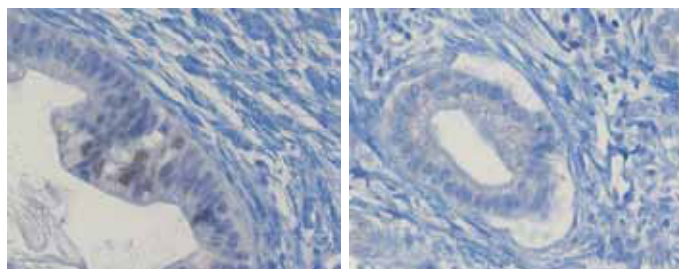

++ CDX2 -

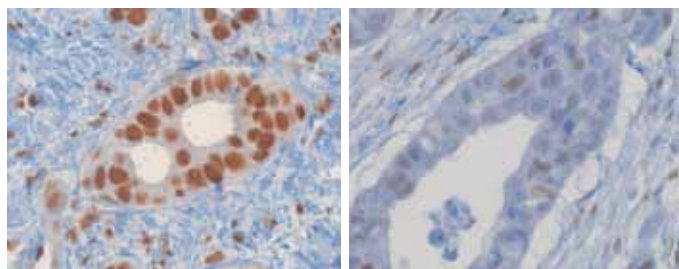

+++ SP1 +
