# Supplementary material for: Google Goes Cancer: Improving Outcome Prediction for Cancer Patients by Network-Based Ranking of Marker Genes
Source: PubMed Central journal article supplement (PMC3355064; doi:10.1371/journal.pcbi.1002511), 2012-05-17
Supplement: pcbi.1002511.s003.pdf [file pcbi.1002511.s003.pdf]

# Survival by adjuvant therapy

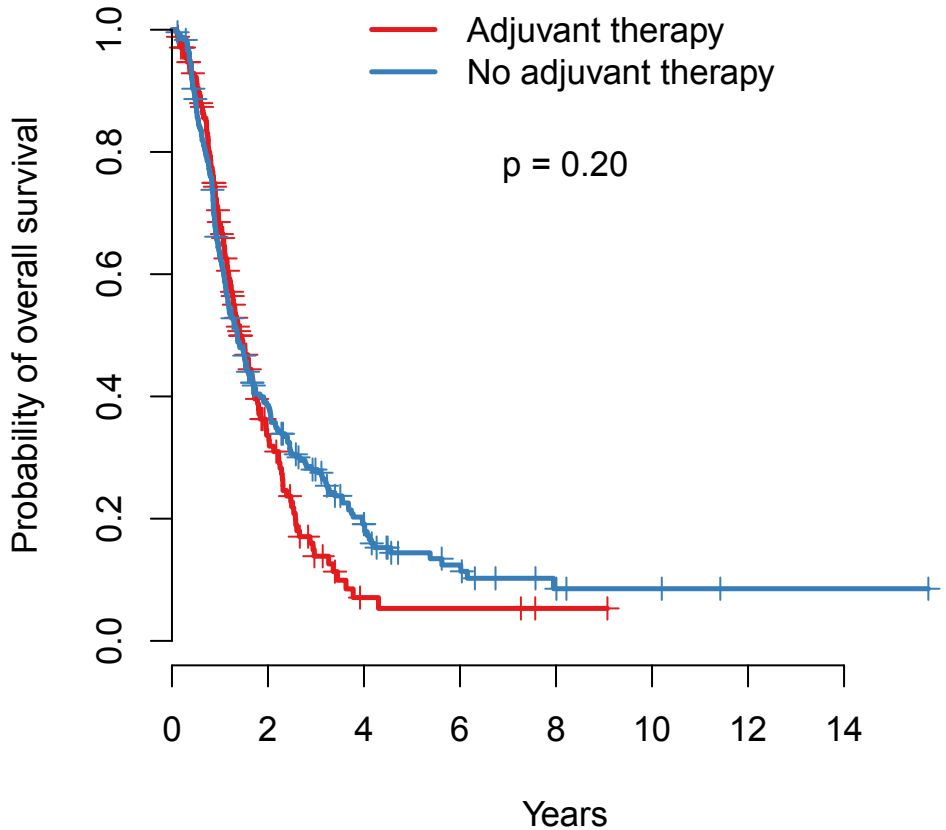

No. at risk

|                     |     |    |    |    |   |   |   |   |
|---------------------|-----|----|----|----|---|---|---|---|
| Adjuvant therapy    | 172 | 38 | 4  | 3  | 1 |   |   |   |
| No adjuvant therapy | 240 | 83 | 32 | 12 | 5 | 3 | 1 | 1 |
