# Supplementary material for: Google Goes Cancer: Improving Outcome Prediction for Cancer Patients by Network-Based Ranking of Marker Genes
Source: PubMed Central journal article supplement (PMC3355064; doi:10.1371/journal.pcbi.1002511), 2012-05-17

**A** Signature for prognosis of patients with adjuvant therapy

ROC curve for test set

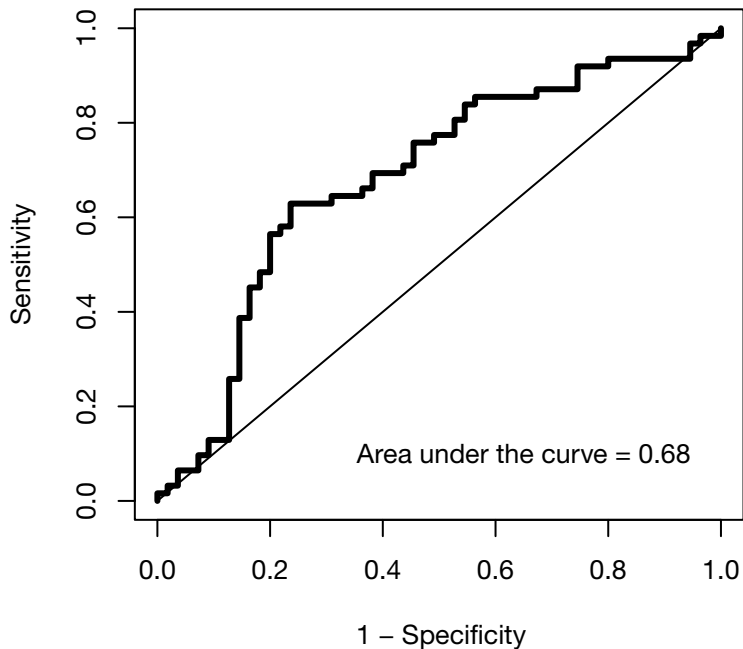

**B** Signature for prognosis of patients without adjuvant therapy

ROC curve for test set

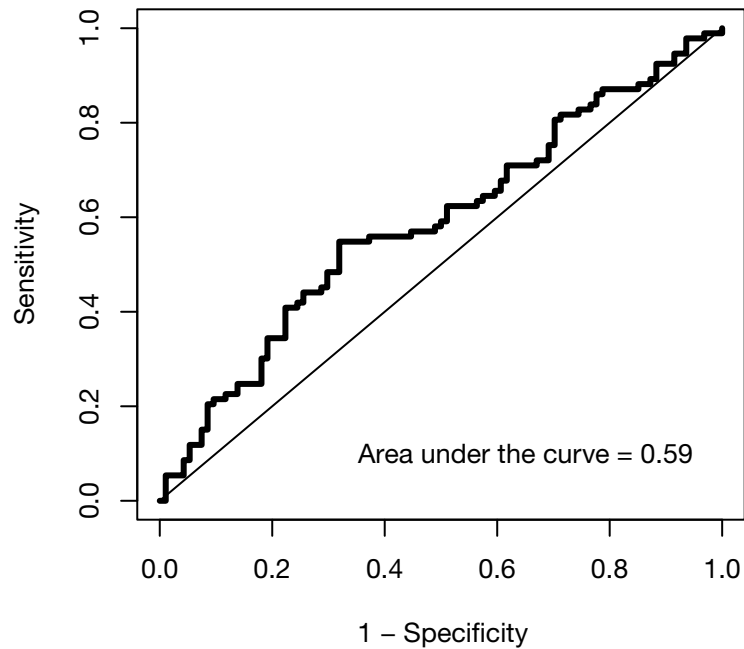

Supplement: pcbi.1002511.s004.pdf [file pcbi.1002511.s004.pdf]
