# Supplementary material for: Google Goes Cancer: Improving Outcome Prediction for Cancer Patients by Network-Based Ranking of Marker Genes
Source: PubMed Central journal article supplement (PMC3355064; doi:10.1371/journal.pcbi.1002511), 2012-05-17

**A** Distribution of gene expression values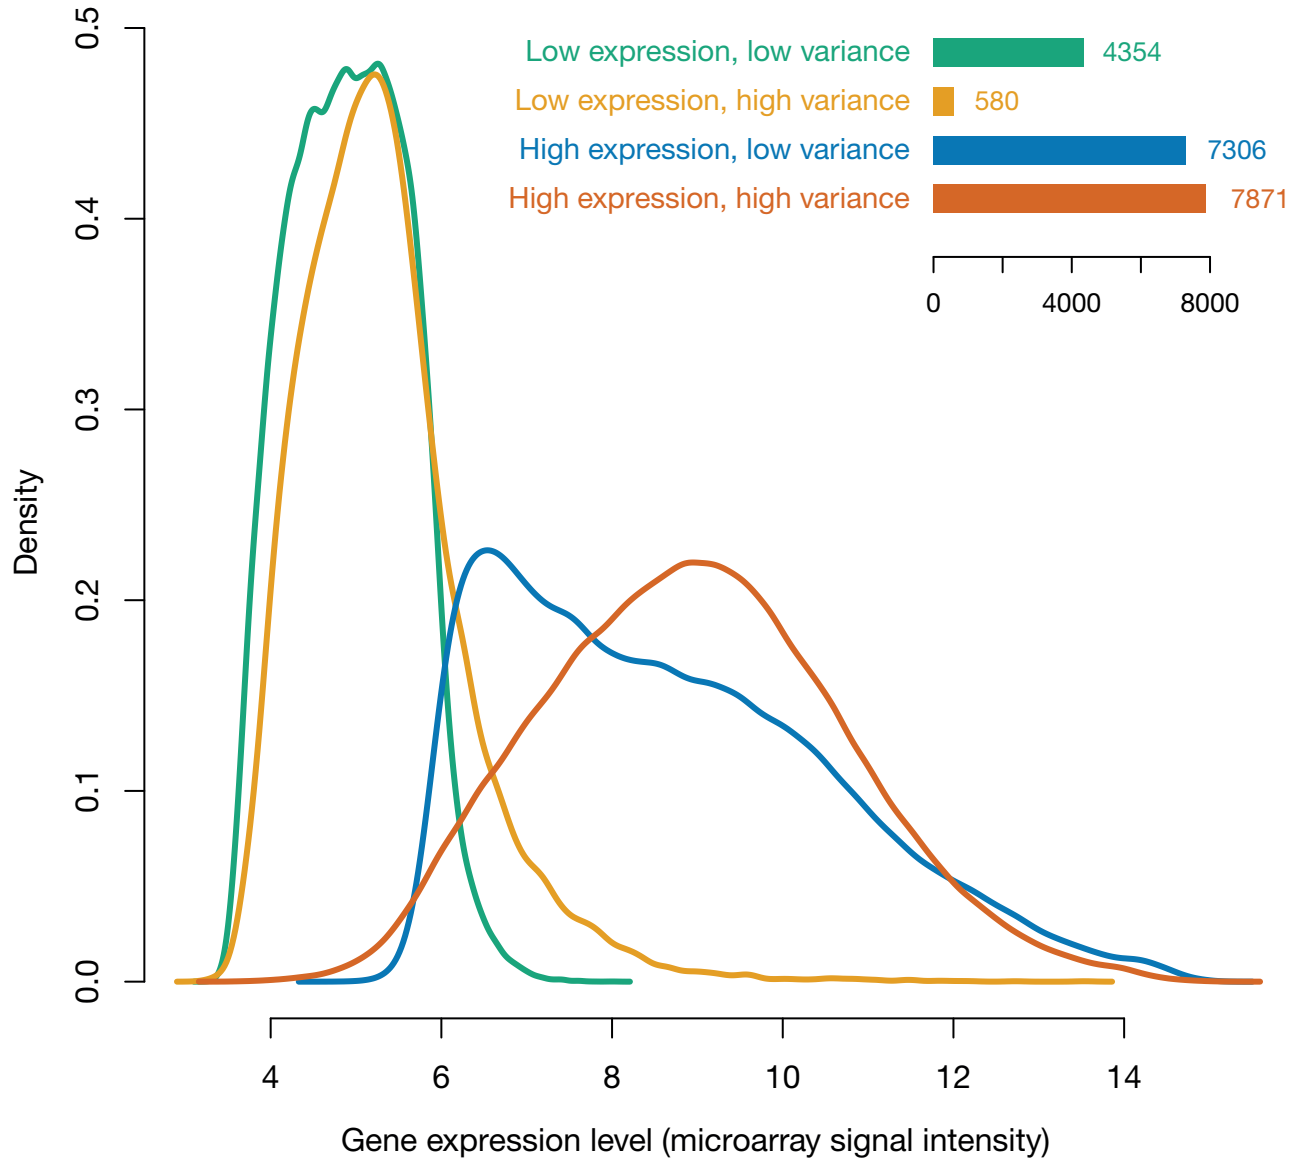**B** Distribution of absolute correlation coefficients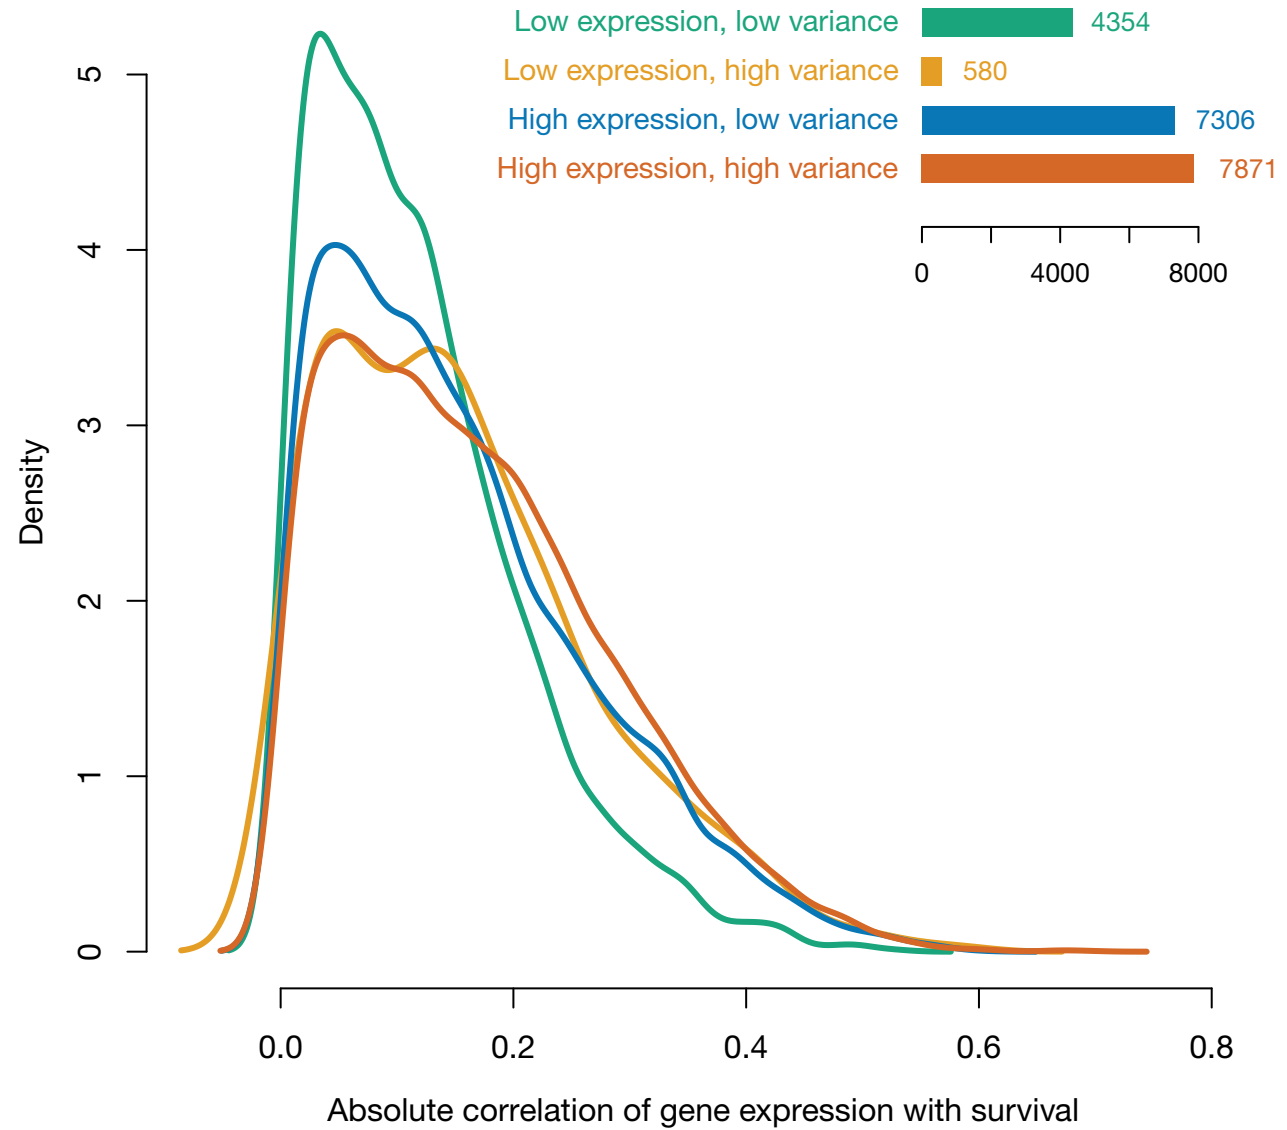

Supplement: pcbi.1002511.s006.pdf [file pcbi.1002511.s006.pdf]
