# Supplementary material for: Google Goes Cancer: Improving Outcome Prediction for Cancer Patients by Network-Based Ranking of Marker Genes
Source: PubMed Central journal article supplement (PMC3355064; doi:10.1371/journal.pcbi.1002511), 2012-05-17
Supplement: pcbi.1002511.s008.pdf [file pcbi.1002511.s008.pdf]

**Table S2. Fifty-one immunohistochemistry markers prognostic for survival in pancreatic cancer, found with a literature search.**

| Entrez Gene ID | Gene Symbol | PubMed IDs                                       |
|----------------|-------------|--------------------------------------------------|
| 1027           | CDKN1B      | 16086840, 16528608, 16951171, 17035403, 18980972 |
| 1029           | CDKN2A      | 17278096, 17420962, 18813127, 19200576, 19664933 |
| 10855          | HPSE        | 11953884, 16110255, 16388520, 17715045           |
| 1508           | CTSB        | 11185708, 15367886                               |
| 1514           | CTSL1       | 2297706, 8694562, 15367886                       |
| 1647           | GADD45A     | 12171884, 16274047, 17230496, 17940512           |
| 1890           | TYMP        | 11745251, 12717266, 16137582, 17443278, 19760965 |
| 2810           | SFN         | 15908786, 19047086                               |
| 3068           | HDGF        | 17062679                                         |
| 3091           | HIF1A       | 18829975, 18927305, 19352387, 19372568, 19690016 |
| 332            | BIRC5       | 16202147                                         |
| 3655           | ITGA6       | 14707725                                         |
| 387            | RHOA        | 18495213                                         |
| 3918           | LAMC2       | 11920553                                         |
| 3958           | LGALS3      | 11815981, 12171885, 12824888, 15548371, 16007065 |
| 4089           | SMAD4       | 15832084, 16137582, 17203996, 18425078, 19165547 |
| 4102           | MAGEA3      | 16331618                                         |
| 4312           | MMP1        | 11181677, 12066203, 15714128, 16678855, 19887609 |
| 4313           | MMP2        | 17120744, 17377415, 18630474, 19165547, 19924022 |
| 4316           | MMP7        | 12066203, 15102692, 15810077, 16699793, 16858545 |
| 4478           | MSN         | 15908786, 17874463                               |
| 4583           | MUC2        | 19236510, 19276352, 19347361, 19412570, 19587537 |
| 4585           | MUC4        | 17079945, 17621592, 17676483, 18475301, 19236510 |
| 4586           | MUC5AC      | 18475301, 19154264, 19276352, 19347361, 19587537 |
| 5176           | SERPINF1    | 15150108                                         |
| 5243           | ABCB1       | 9537202, 11039467, 15688370, 15841045, 19598259  |
| 5268           | SERPINB5    | 15053038, 15842640, 17396143, 19389518, 19664933 |
| 5292           | PIM1        | 18708761, 19528349                               |
| 5320           | PLA2G2A     | 19342650                                         |
| 5468           | PPARG       | 11745416, 17085658, 19396032                     |
| 5743           | PTGS2       | 15532792, 16467169, 18059224, 19098866, 19389518 |
| 581            | BAX         | 16202147, 16274043, 18074738, 19483105, 19664933 |
| 596            | BCL2        | 18751407, 19483105, 19664933, 19751911, 19920820 |
| 6273           | S100A2      | 17200013, 17940995                               |
| 6382           | SDC1        | 15459490, 15886501, 17455248, 18751407, 19276352 |
| 6513           | SLC2A1      | 16096651, 19085834, 19092346, 19690016, 19819644 |
| 664            | BNIP3       | 15856026                                         |
| 6678           | SPARC       | 16041213, 17080236, 17235047                     |
| 7040           | TGFB1       | 16094523, 16101174, 16838117, 17592292, 17873896 |
| 7076           | TIMP1       | 11773977, 12115876, 15534120, 16428484           |
| 7077           | TIMP2       | 11181677, 11773977, 18630474                     |
| 7157           | TP53        | 19214369, 19276352, 19578815, 19664933, 19819644 |
| 7345           | UCHL1       | 11156232, 11801558                               |
| 7415           | VCP         | 14761919, 15452376                               |
| 7422           | VEGFA       | 18612155, 18762366, 18974391, 19010843, 19389518 |
| 8434           | RECK        | 12738734                                         |
| 857            | CAV1        | 12402154, 17471232, 18802406, 19509264, 19665245 |
| 8870           | IER3        | 18026799                                         |
| 898            | CCNE1       | 10349991, 15166955, 17035403                     |
| 9166           | EBAG9       | 11992411, 12855262, 17932753                     |
| 9423           | NTN1        | 17549567                                         |
