# Supplementary material for: Google Goes Cancer: Improving Outcome Prediction for Cancer Patients by Network-Based Ranking of Marker Genes
Source: PubMed Central journal article supplement (PMC3355064; doi:10.1371/journal.pcbi.1002511), 2012-05-17
Supplement: pcbi.1002511.s009.pdf [file pcbi.1002511.s009.pdf]

**Table S3. KEGG pathways most affected by signature genes and their interaction partners.**

| <b>Pathway</b>                            | <b>Number of genes</b> | <b>Category</b>         |
|-------------------------------------------|------------------------|-------------------------|
| Cytokine-cytokine receptor interaction    | 34                     | Signaling               |
| MAPK signaling pathway                    | 21                     | Signaling               |
| Jak-STAT signaling pathway                | 21                     | Signaling               |
| Focal adhesion                            | 20                     | Basic cellular function |
| Small cell lung cancer                    | 16                     | Cancer                  |
| Neuroactive ligand-receptor interaction   | 15                     |                         |
| Complement and coagulation cascades       | 14                     |                         |
| Calcium signaling pathway                 | 13                     | Signaling               |
| Hematopoietic cell lineage                | 13                     |                         |
| Toll-like receptor signaling pathway      | 12                     | Signaling               |
| Regulation of actin cytoskeleton          | 12                     | Basic cellular function |
| Colorectal cancer                         | 12                     | Cancer                  |
| Prostate cancer                           | 12                     | Cancer                  |
| Drug metabolism - cytochrome P450         | 11                     |                         |
| p53 signaling pathway                     | 11                     | Signaling               |
| Apoptosis                                 | 11                     | Basic cellular function |
| Natural killer cell mediated cytotoxicity | 11                     |                         |
| Pancreatic cancer                         | 11                     | Cancer                  |
| Chronic myeloid leukemia                  | 11                     | Cancer                  |
| Cell Communication                        | 10                     | Basic cellular function |
| Cell cycle                                | 10                     | Basic cellular function |
| Wnt signaling pathway                     | 10                     | Signaling               |
